# Supplementary material for: Antimicrobial Stewardship in the Emergency Department Observation Unit: Definition of a New Indicator and Evaluation of Antimicrobial Use and Clinical Outcomes
Source: MDPI journal article supplement (doi:10.3390/antibiotics13040356), 2024-04-12
Supplement: s1 [file s1]

## Supplementary Materials

**Table S1.** Differences between the pre-intervention period and the antimicrobial stewardship program (ASP) period regarding pre-post analysis of antimicrobial use.

| Outcomes                       | Pre-<br>Intervention<br>Period | ASP Period  | <i>p</i> -<br>value |
|--------------------------------|--------------------------------|-------------|---------------------|
| Total J01+J02                  | 68.7 ± 9.4                     | 53.9 ± 11.9 | <0.001              |
| Ceftriaxone                    | 10.9 ± 1.8                     | 15.3 ± 2.2  | <0.001              |
| Amoxicillin-clavulanic acid    | 20.2 ± 5.4                     | 9.7 ± 3.2   | <0.001              |
| Levofloxacin                   | 14.7 ± 4.9                     | 11.7 ± 5.5  | 0.058               |
| Piperacillin-tazobactam        | 4.5 ± 1.2                      | 3.0 ± 0.6   | <0.001              |
| Ciprofloxacin                  | 4.9 ± 1.1                      | 2.4 ± 1.3   | <0.001              |
| Azithromycin                   | 1.1 ± 0.6                      | 1.8 ± 1.0   | 0.136               |
| Metronidazole                  | 1.0 ± 0.6                      | 1.1 ± 1.1   | 0.136               |
| Ertapenem                      | 1.7 ± 0.8                      | 0.6 ± 0.3   | <0.001              |
| Antipseudomonal cephalosporins | 0.5 ± 0.2                      | 1.0 ± 0.2   | <0.001              |
| Meropenem                      | 0.8 ± 0.5                      | 0.6 ± 0.3   | 0.766               |
| Vancomycin                     | 0.6 ± 0.2                      | 0.6 ± 0.2   | 0.409               |

Data are presented as the mean ± standard deviation of quarterly defined daily doses (DDDs) per 100 patients transferred to the Observation Unit (TOs).

*p*-values represent the results from Student's *t*-tests or Mann-Whitney *U* tests, according to the data distribution. ASP, antimicrobial stewardship program.

Antipseudomonal cephalosporins refer specifically to cefepime and ceftazidime.

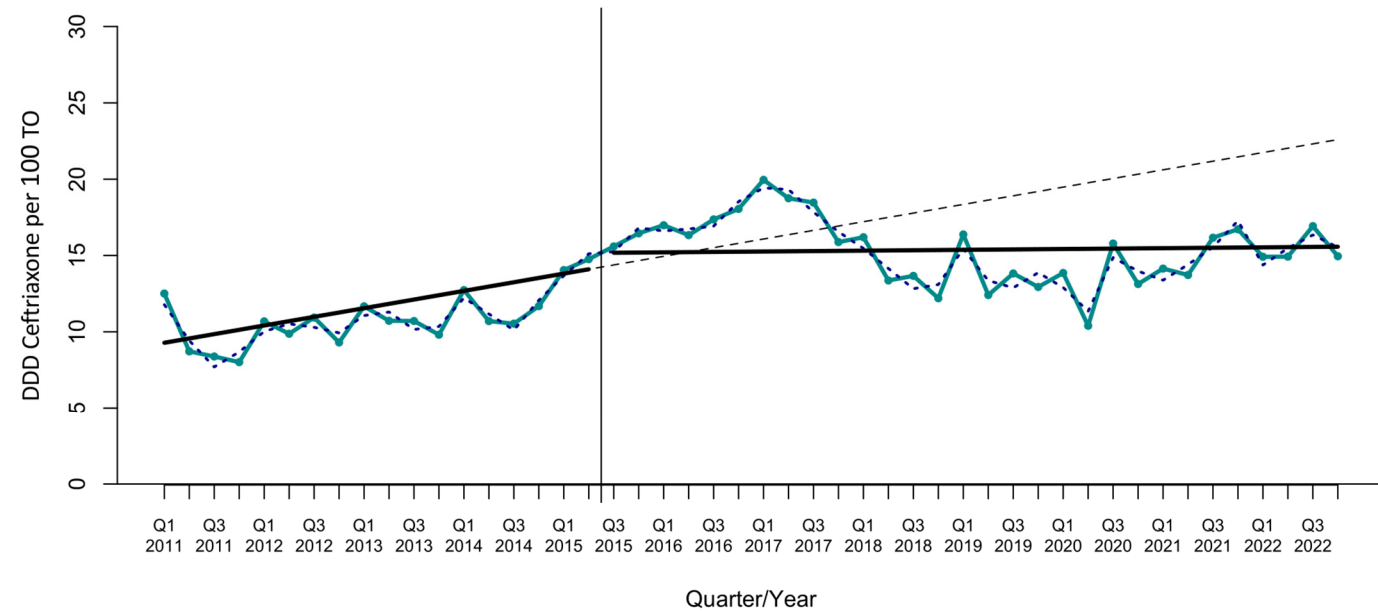

**Figure S1.** Interrupted time-series analysis of the trends in ceftriaxone observed before and after the implementation of the antimicrobial stewardship program.

Solid lines show the observed trend during the pre-intervention and intervention periods. Dashed line shows the expected trend after the intervention according to the pre-intervention values. The dotted blue line shows the deseasonalized series. DDDs, defined daily doses. TOs, patients transferred to the Observation Unit. Q, quarter.

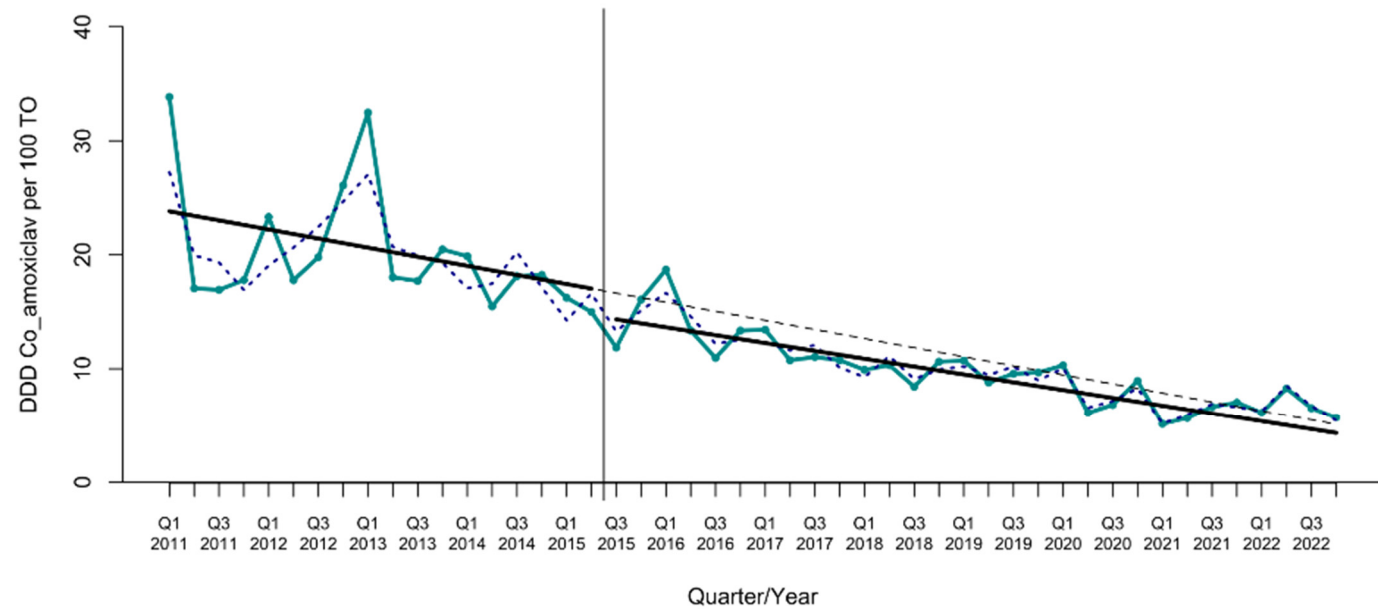

**Figure S2.** Interrupted time-series analysis of the trends in amoxicillin-clavulanic acid observed before and after the implementation of the antimicrobial stewardship program.

Solid lines show the observed trend during the pre-intervention and intervention periods. The dashed line shows the expected trend after the intervention according to the pre-intervention values. The dotted blue line shows the deseasonalized series. DDDs, defined daily doses. TOs, patients transferred to the Observation Unit. Q, quarter.

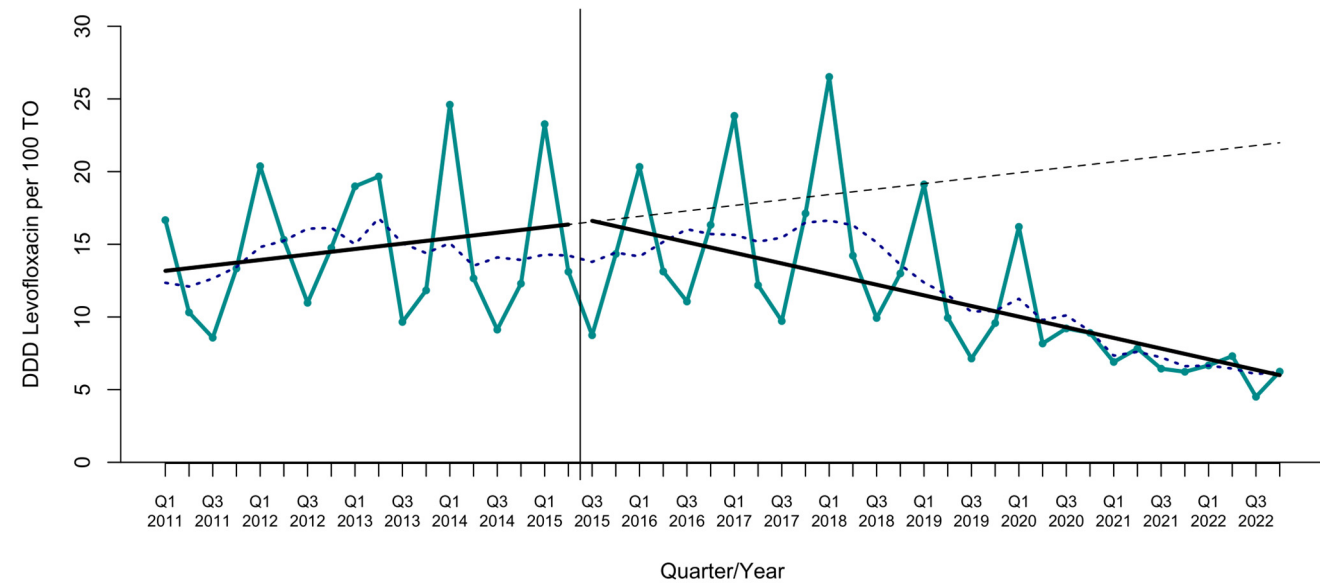

**Figure S3.** Interrupted time-series analysis of the trends in levofloxacin observed before and after the implementation of the antimicrobial stewardship program.

Solid lines show the observed trend during the pre-intervention and intervention periods. The dashed line shows the expected trend after the intervention according to the pre-intervention values. The dotted blue line shows the deseasonalized series. DDDs, defined daily doses. TOs, patients transferred to the Observation Unit. Q, quarter.

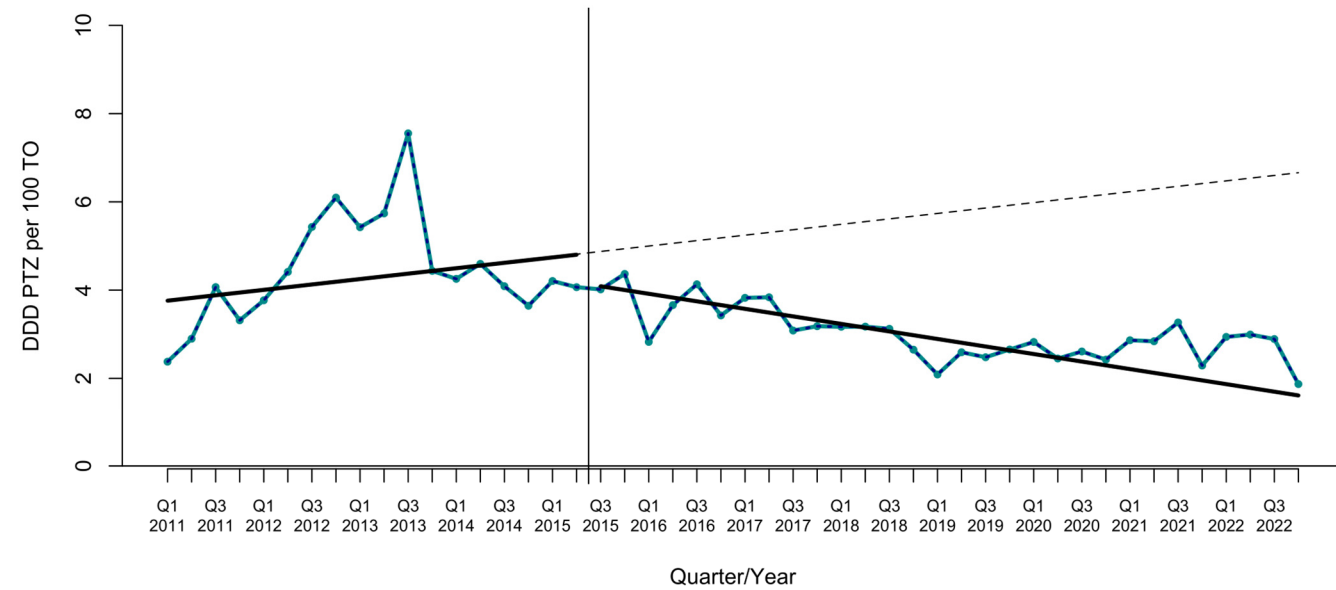

**Figure S4.** Interrupted time-series analysis of the trends in piperacillin-tazobactam (PTZ) observed before and after the implementation of the antimicrobial stewardship program.

Solid lines show the observed trend during the pre-intervention and intervention periods. The dashed line shows the expected trend after the intervention according to the pre-intervention values. DDDs, defined daily doses. TOs, patients transferred to the Observation Unit. Q, quarter.

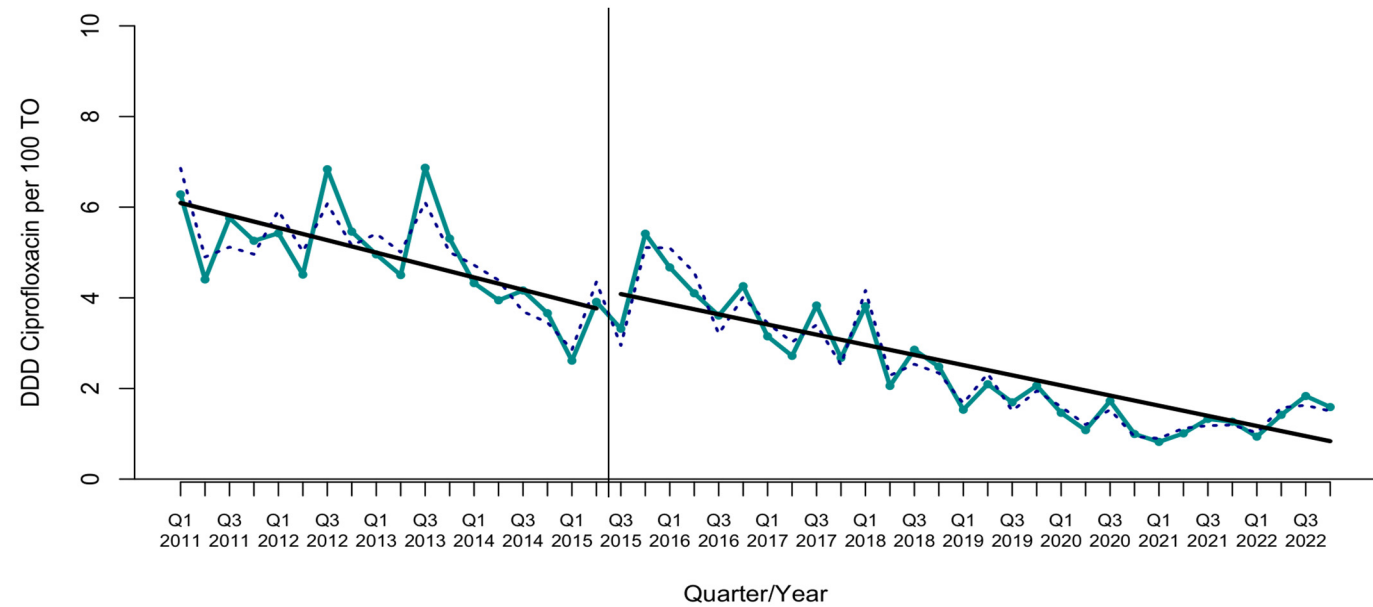

**Figure S5.** Interrupted time-series analysis of the trends in ciprofloxacin observed before and after the implementation of the antimicrobial stewardship program.

Solid lines show the observed trend during the pre-intervention and intervention periods. The dashed line shows the expected trend after the intervention according to the pre-intervention values. The dotted blue line shows the deseasonalized series. DDDs, defined daily doses. TOs, patients transferred to the Observation Unit. Q, quarter.

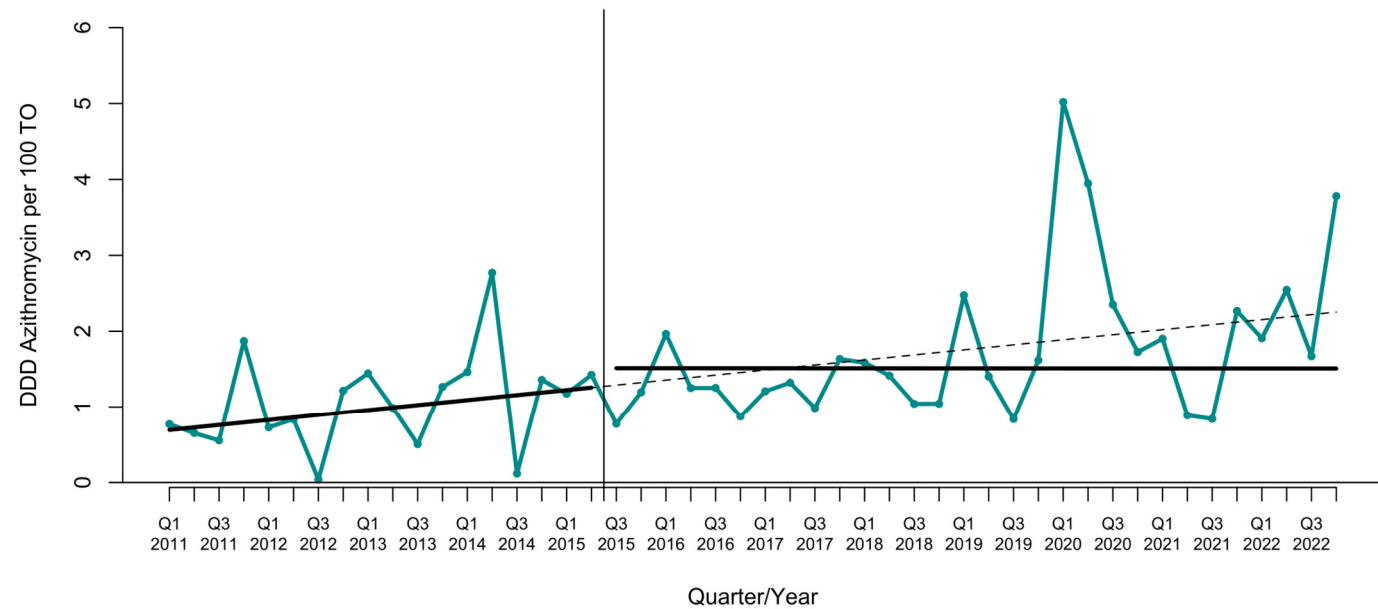

**Figure S6.** Interrupted time-series analysis of the trends in azithromycin observed before and after the implementation of the antimicrobial stewardship program.

Solid lines show the observed trend during the pre-intervention and intervention periods. The dashed line shows the expected trend after the intervention according to the pre-intervention values. DDDs, defined daily doses. TOs, patients transferred to the Observation Unit. Q, quarter.

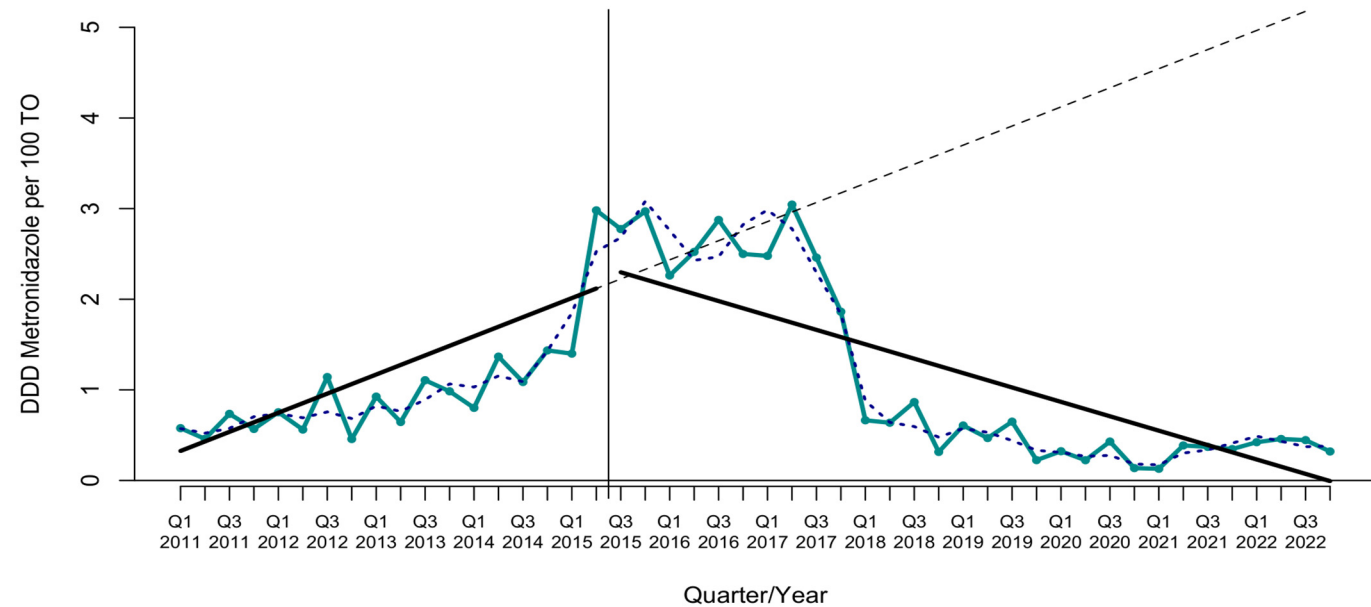

**Figure S7.** Interrupted time-series analysis of the trends in metronidazole observed before and after the implementation of the antimicrobial stewardship program.

Solid lines show the observed trend during the pre-intervention and intervention periods. The dashed line shows the expected trend after the intervention according to the pre-intervention values. The dotted blue line shows the deseasonalized series. DDDs, defined daily doses. TOs, patients transferred to the Observation Unit. Q, quarter.



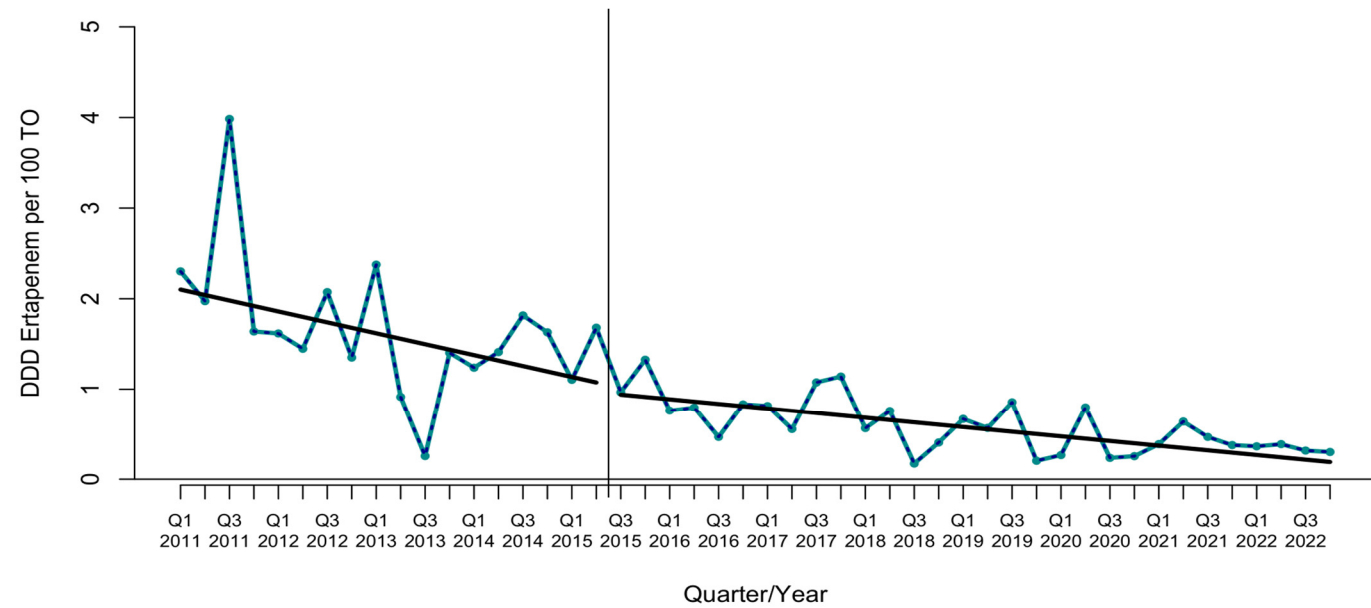

**Figure S8.** Interrupted time-series analysis of the trends in ertapenem observed before and after the implementation of the antimicrobial stewardship program.

Solid lines show the observed trend during the pre-intervention and intervention periods. DDDs, defined daily doses. TOs, patients transferred to the Observation Unit. Q, quarter.

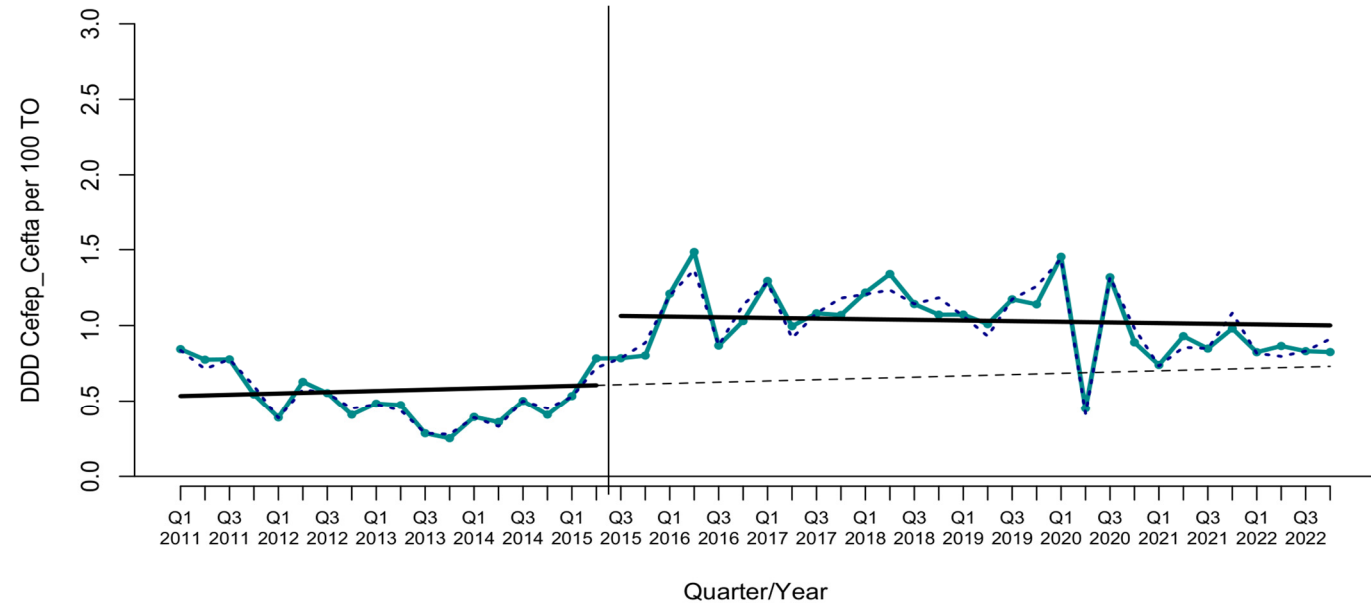

**Figure S9.** Interrupted time-series analysis of the trends in cefepime and ceftazidime observed before and after the implementation of the antimicrobial stewardship program.

Solid lines show the observed trend during the pre-intervention and intervention periods. The dashed line shows the expected trend after the intervention according to the pre-intervention values. The dotted blue line shows the deseasonalized series. DDDs, defined daily doses. TOs, patients transferred to the Observation Unit. Q, quarter.

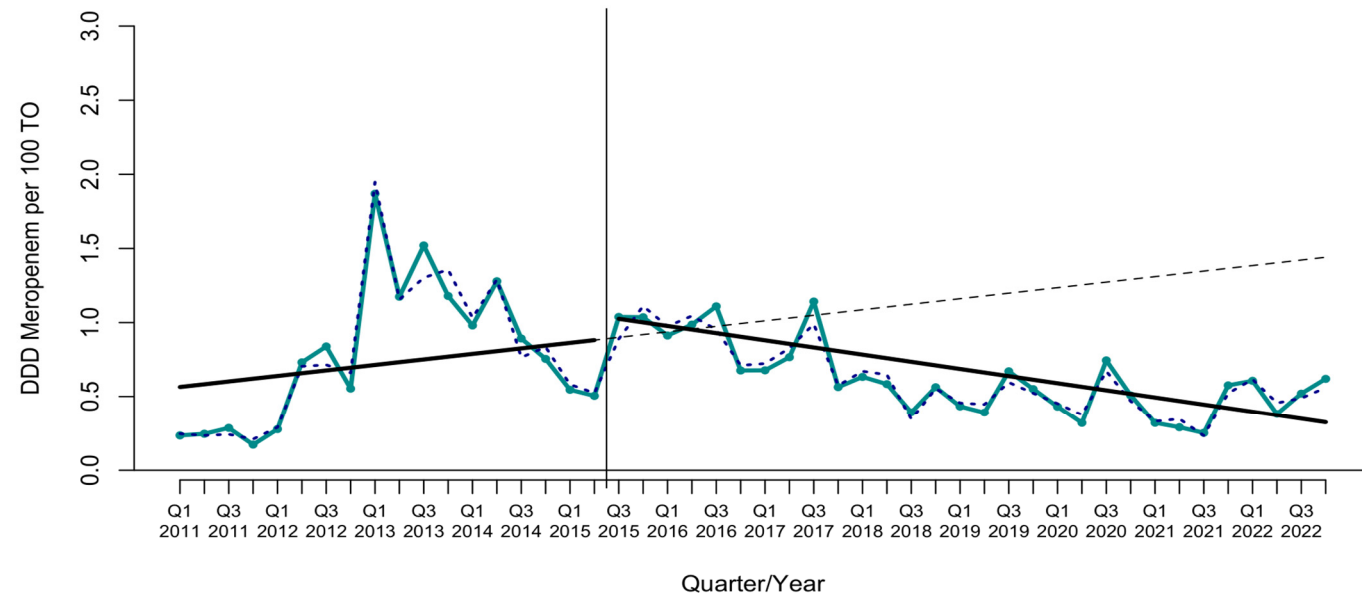

**Figure S10.** Interrupted time-series analysis of the trends in meropenem observed before and after the implementation of the antimicrobial stewardship program.

Solid lines show the observed trend during the pre-intervention and intervention periods. The dashed line shows the expected trend after the intervention according to the pre-intervention values. The dotted blue line shows the deseasonalized series. DDDs, defined daily doses. TOs, patients transferred to the Observation Unit. Q, quarter.

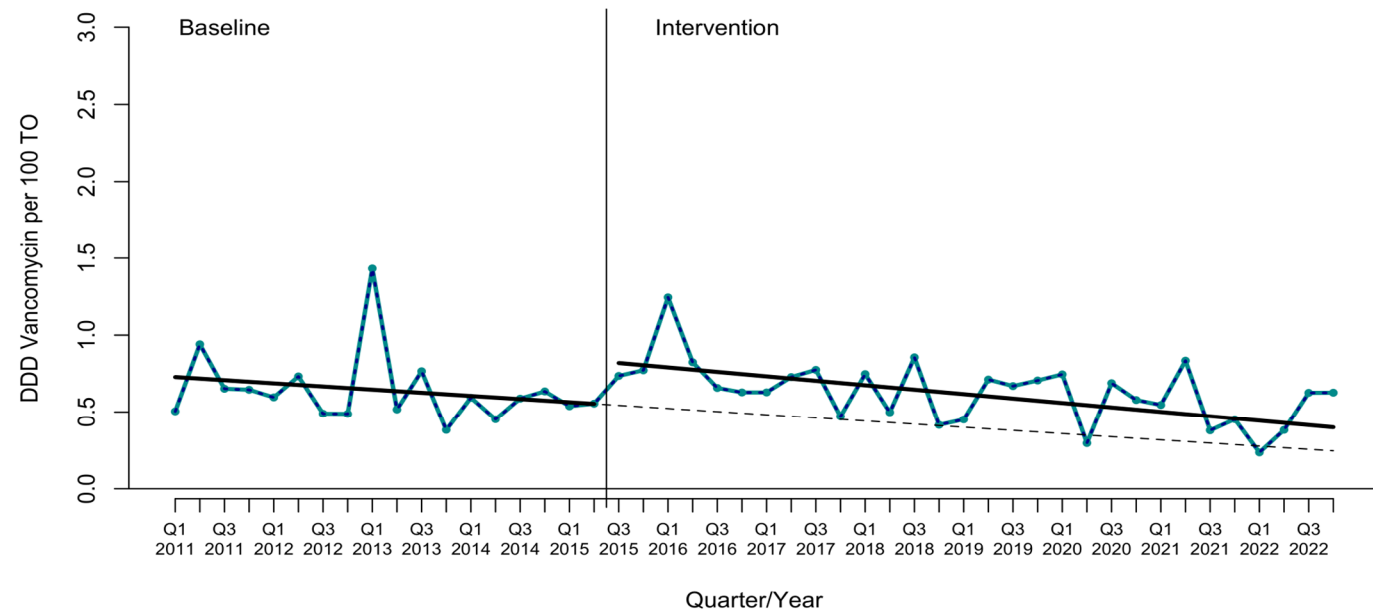

**Figure S11.** Interrupted time-series analysis of the trends in vancomycin observed before and after the implementation of the antimicrobial stewardship program.

Solid lines show the observed trend during the pre-intervention and intervention periods. The dashed line shows the expected trend after the intervention according to the pre-intervention values. DDDs, defined daily doses. TOs, patients transferred to the Observation Unit. Q, quarter.

**Table S2.** Data of the blood cultures collected annually in the Emergency Department (ED) per 100 ED visits.

| <b>Year</b> | <b>Number of<br/>Blood Cultures</b> | <b>ED visits</b> | <b>Blood Cultures<br/>per 100 ED Visits</b> |
|-------------|-------------------------------------|------------------|---------------------------------------------|
| 2011        | 16,086                              | 119,389          | 13                                          |
| 2012        | 16,210                              | 116,128          | 14                                          |
| 2013        | 16,724                              | 115,721          | 14                                          |
| 2014        | 16,754                              | 116,139          | 14                                          |
| 2015        | 17,903                              | 119,837          | 15                                          |
| 2016        | 18,621                              | 125,410          | 15                                          |
| 2017        | 19,980                              | 125,520          | 16                                          |
| 2018        | 20,300                              | 125,011          | 16                                          |
| 2019        | 22,849                              | 133,467          | 17                                          |
| 2020        | 19,466                              | 104,258          | 19                                          |
| 2021        | 22,153                              | 123,224          | 18                                          |
| 2022        | 23,830                              | 132,560          | 18                                          |

**Table S3.** Incidence of bloodstream infections and mortality of patients diagnosed with bloodstream infections by causative microorganisms (2011–2022).

| Microorganism                   | Number of BSI | Number of Deaths on Day +14 (%) |
|---------------------------------|---------------|---------------------------------|
| Overall                         | 3392          | 317 (9.3)                       |
| <i>Escherichia coli</i>         | 2043          | 151 (7.4)                       |
| ESBL <i>E. coli</i>             | 195           | 16 (8.2)                        |
| <i>Klebsiella pneumoniae</i>    | 530           | 40 (7.5)                        |
| ESBL <i>K. pneumoniae</i>       | 81            | 10 (12.3)                       |
| <i>Pseudomonas aeruginosa</i>   | 250           | 39 (15.6)                       |
| MDR <i>P. aeruginosa</i>        | 15            | 2 (13.3)                        |
| <i>Staphylococcus aureus</i>    | 370           | 55 (14.9)                       |
| MRSA                            | 41            | 9 (22.0)                        |
| <i>Streptococcus pneumoniae</i> | 199           | 32 (16.1)                       |

ESBL, extended-spectrum  $\beta$ -lactamase; MDR, multidrug-resistant; MRSA, methicillin-resistant *Staphylococcus aureus*; BSIs, bloodstream infections.

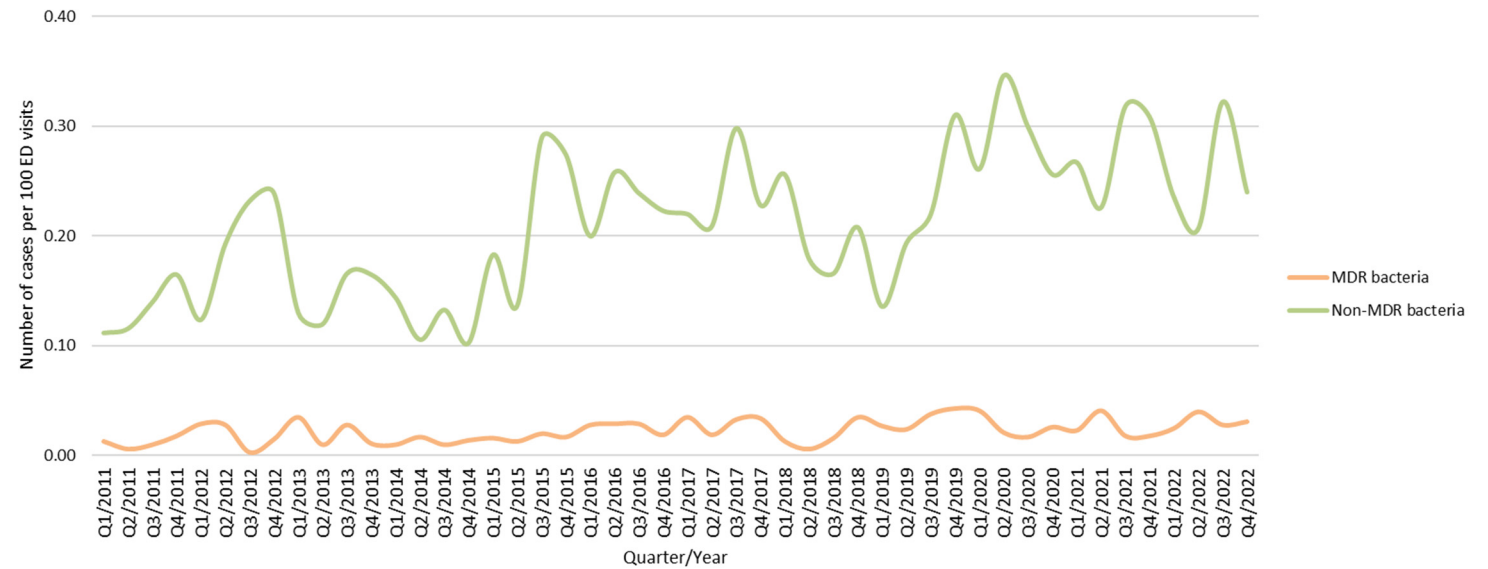

**Figure S12.** Time-series plot of incidence density of bloodstream infections during the study period (2011–2022). Data are presented as the quarterly number of cases per 100 Emergency Department (ED) visits.

“MDR bacteria” refer to extended-spectrum  $\beta$ -lactamase (ESBL) *E. coli*, ESBL *K. pneumoniae*, MDR *P. aeruginosa*, and methicillin-resistant *S. aureus*. “Non-MDR bacteria” include all other bloodstream infection pathogens monitored.

**Table S4.** Differences between the pre-intervention period and the antimicrobial stewardship program (ASP) period regarding the pre-post analysis of incidence density of bloodstream infections.

| Outcomes            | Pre-<br>Intervention<br>Period | ASP Period | <i>p</i> -<br>value |
|---------------------|--------------------------------|------------|---------------------|
| <b>Overall BSIs</b> | 0.17±0.04                      | 0.27±0.05  | <0.001              |
| MDR bacteria        | 0.02±0.01                      | 0.03±0.01  | <0.001              |
| Non-MDR bacteria    | 0.15±0.04                      | 0.25±0.05  | <0.001              |

Data are presented as mean ± standard deviation of the quarterly number of cases per 100 Emergency Department visits. *p*-values represent the results from Student's *t*-tests or Mann-Whitney U tests, according to the data distribution. "MDR bacteria" refer to extended-spectrum β-lactamase (ESBL) *E. coli*, ESBL *K. pneumoniae*, MDR *P. aeruginosa*, and methicillin-resistant *S. aureus*. "Non-MDR bacteria" include all other bloodstream infection pathogens monitored. BSIs, bloodstream infections.



**Table S5.** Interrupted time-series analysis of changes in trends of the incidence density of bloodstream infections.

| Outcomes         | Regression Intercept      | Pre-Intervention Trend       | Change in Level <sup>a</sup> | Change in Trend <sup>b</sup> | Absolute Effect            | Relative Effect <sup>c</sup> (%) |
|------------------|---------------------------|------------------------------|------------------------------|------------------------------|----------------------------|----------------------------------|
| Overall BSI      | 0.171<br>(0.111 to 0.230) | −0.001<br>(−0.006 to 0.005)  | 0.099<br>(0.032 to 0.167)    | 0.002<br>(−0.004 to 0.008)   | 0.161<br>(0.054 to 0.268)  | 123.2<br>(41.3 to 284.7)         |
| MDR bacteria     | 0.016<br>(0.007 to 0.026) | −0.0001<br>(−0.001 to 0.001) | 0.008<br>(−0.003 to 0.019)   | 0.0002<br>(−0.001 to 0.001)  | 0.015<br>(−0.018 to 0.049) | 111.7<br>(−402.2 to 625.5)       |
| Non-MDR bacteria | 0.155<br>(0.098 to 0.211) | −0.001<br>(−0.006 to 0.004)  | 0.088<br>(0.023 to 0.154)    | 0.002<br>(−0.004 to 0.008)   | 0.143<br>(0.004 to 0.282)  | 119.9<br>(23.9 to 215.7)         |

Data are presented as the quarterly number of cases per 100 Emergency Department visits with a 95% confidence interval unless otherwise specified. <sup>a</sup>Increase or decrease in the first quarter after the start of the antimicrobial stewardship program (ASP) period with respect to the expected value. <sup>b</sup>Change in slope for the ASP period. <sup>c</sup>Percentage difference between the expected value according to the pre-intervention trend and the trend at the end of the ASP period. “MDR bacteria” refer to extended-spectrum  $\beta$ -lactamase (ESBL) *E. coli*, ESBL *K. pneumoniae*, MDR *P. aeruginosa*, and methicillin-resistant *S. aureus*. “Non-MDR bacteria” include all other bloodstream infection pathogens monitored. BSIs, bloodstream infections.

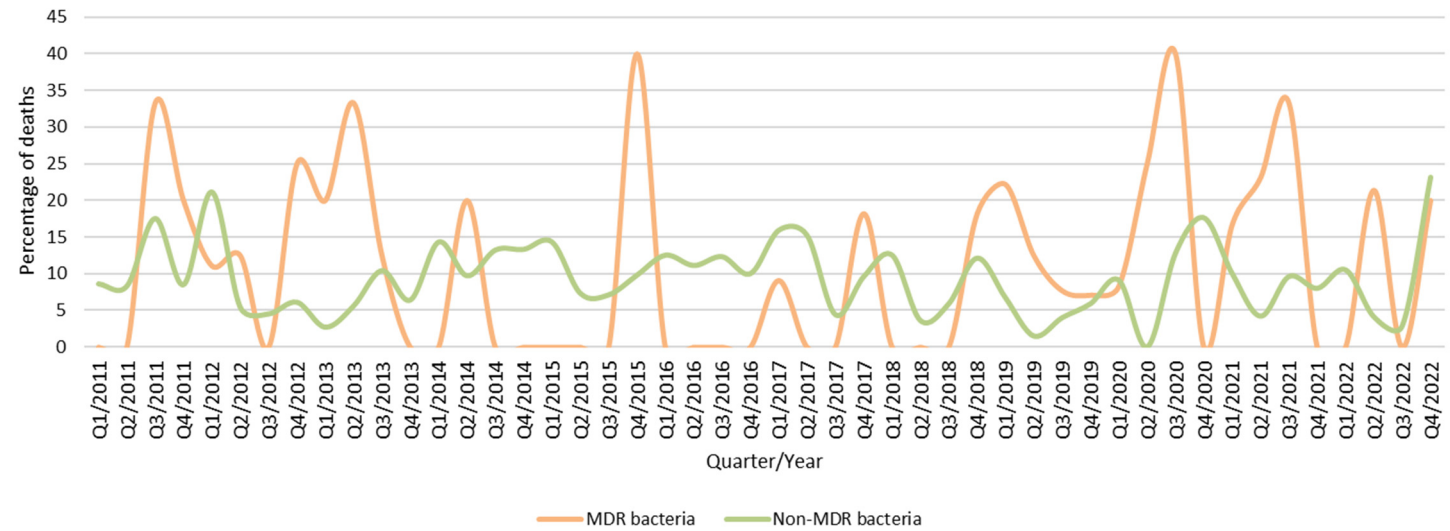

**Figure S13.** Time-series plot of mortality rate of bloodstream infections during the study period (2011–2022). Data are presented as quarterly percentage of all-cause deaths on day +14.

“MDR bacteria” refer to extended-spectrum  $\beta$ -lactamase (ESBL) *E. coli*, ESBL *K. pneumoniae*, MDR *P. aeruginosa*, and methicillin-resistant *S. aureus*. “Non-MDR bacteria” include all other bloodstream infection pathogens monitored.

**Table S6.** Differences between the pre-intervention period and the antimicrobial stewardship program (ASP) period regarding the pre-post analysis of the mortality rate of bloodstream infections.

| Outcomes         | Pre-Intervention Period | ASP Period    | <i>p</i> -value |
|------------------|-------------------------|---------------|-----------------|
| Overall BSIs     | 9.98 ± 4.17             | 9.25 ± 4.64   | 0.587           |
| MDR bacteria     | 10.43 ± 12.18           | 10.76 ± 12.74 | 0.946           |
| Non-MDR bacteria | 9.84 ± 4.87             | 9.07 ± 5.10   | 0.606           |

Data are presented as the mean ± standard deviation of the quarterly percentage of all-cause deaths on day +14. *p*-values represent the results from Student's *t*-tests or Mann–Whitney U tests, according to the data distribution. “MDR bacteria” refer to extended-spectrum β-lactamase (ESBL) *E. coli*, ESBL *K. pneumoniae*, MDR *P. aeruginosa*, and methicillin-resistant *S. aureus*. “Non-MDR bacteria” include all other bloodstream infection pathogens monitored. BSIs, bloodstream infections.

**Table S7.** Interrupted time-series analysis of changes in trends of the mortality rate of bloodstream infections.

| Outcomes         | Regression Intercept     | Pre-Intervention Trend    | Change in Level <sup>a</sup> | Change in Trend <sup>b</sup> | Absolute Effect            |
|------------------|--------------------------|---------------------------|------------------------------|------------------------------|----------------------------|
| Overall BSIs     | 10.03<br>(5.85 to 14.22) | -0.004<br>(-0.39 to 0.38) | -0.66<br>(-5.67 to 4.35)     | -0.001<br>(-0.43 to 0.43)    | -0.67<br>(-15.99 to 14.65) |
| MDR bacteria     | 17.19<br>(5.42 to 28.96) | -0.71<br>(-1.80 to 0.38)  | 0.59<br>(-13.48 to 14.65)    | 1.09<br>(-0.12 to 2.28)      | 16.70<br>(-5.05 to 38.45)  |
| Non-MDR bacteria | 9.33<br>(4.29 to 14.38)  | 0.05<br>(-0.41 to 0.51)   | -0.49<br>(-6.50 to 5.52)     | -0.10<br>(-0.61 to 0.42)     | -3.42<br>(-21.88 to 15.03) |

Data are presented as a quarterly percentage of deaths on day +14 with a 95% confidence interval unless otherwise specified.

<sup>a</sup>Increase or decrease in the first quarter after the start of the antimicrobial stewardship program (ASP) period with respect to the expected value. <sup>b</sup>Change in slope for the ASP period. “MDR bacteria” refer to extended-spectrum  $\beta$ -lactamase (ESBL) *E. coli*, ESBL *K. pneumoniae*, MDR *P. aeruginosa*, and methicillin-resistant *S. aureus*. “Non-MDR bacteria” include all other bloodstream infection pathogens monitored. BSIs, bloodstream infections.
